# Supplementary material
Source: PubMed Central journal article supplement (PMC123126)

A.

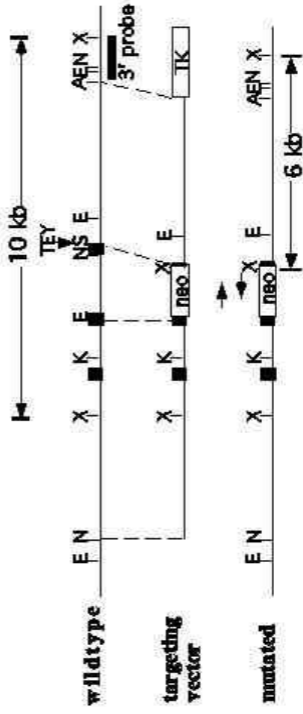

B.

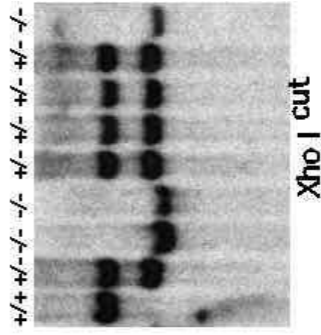

Supplement: supp_142293999_2939Fig6.pdf [file supp_142293999_2939Fig6.pdf]
